# Supplementary material for: Evaluating ChatGPT Efficacy in Navigating the Spanish Medical Residency Entrance Examination (MIR): A New Horizon for AI in Clinical Medicine
Source: Preprints.org preprint supplement (doi:10.20944/preprints202309.1272.v1), 2023-09-19
Supplement: Supplementary file 2 [file supplementary]

Table S2. Answer to MIR examination questions.

| QN | CA | QN | CA | QN  | CA | v   | RC | v   | RC |
|----|----|----|----|-----|----|-----|----|-----|----|
| 1  | 2  | 38 | 3  | 75  | 2  | 112 | 2  | 149 | 3  |
| 2  | 2  | 39 | 2  | 76  | 4  | 113 | 4  | 150 | 4  |
| 3  | 3  | 40 | 3  | 77  | 4  | 114 | 1  | 151 | 1  |
| 4  | 3  | 41 | 2  | 78  | 2  | 115 | 3  | 152 | 4  |
| 5  | 1  | 42 | 1  | 79  | 1  | 116 | 3  | 153 | 3  |
| 6  | 3  | 43 | 4  | 80  | 3  | 117 | 2  | 154 | 1  |
| 7  | 1  | 44 | 4  | 81  | 4  | 118 | 1  | 155 | 3  |
| 8  | 2  | 45 | 2  | 82  | 3  | 119 | 3  | 156 | 2  |
| 9  | 1  | 46 | 4  | 83  | 2  | 120 | 1  | 157 | 1  |
| 10 | 2  | 47 | 1  | 84  | 1  | 121 | 3  | 158 | 4  |
| 11 | 4  | 48 | 2  | 85  | 3  | 122 | 2  | 159 | 4  |
| 12 | 3  | 49 | 4  | 86  | 1  | 123 | 1  | 160 | 3  |
| 13 | 4  | 50 | 2  | 87  | 2  | 124 | 2  | 161 | 2  |
| 14 | 3  | 51 | 3  | 88  | 4  | 125 | 3  | 162 | 3  |
| 15 | 1  | 52 | 3  | 89  | 1  | 126 | 4  | 163 | 2  |
| 16 | 2  | 53 | 2  | 90  | 1  | 127 | 2  | 164 | 1  |
| 17 | 1  | 54 | 1  | 91  | 1  | 128 | 3  | 165 | 3  |
| 18 | 2  | 55 | 1  | 92  | 4  | 129 | 1  | 166 | 3  |
| 19 | 1  | 56 | 3  | 93  | 2  | 130 | 2  | 167 | 4  |
| 20 | 1  | 57 | 4  | 94  | 2  | 131 | 3  | 168 | 4  |
| 21 | 4  | 58 | 1  | 95  | 3  | 132 | 1  | 169 | 2  |
| 22 | 2  | 59 | 1  | 96  | 1  | 133 | 2  | 170 | 1  |
| 23 | 4  | 60 | 3  | 97  | 4  | 134 | 4  | 171 | 3  |
| 24 | 4  | 61 | 4  | 98  | 2  | 135 | 1  | 172 | 1  |
| 25 | 4  | 62 | 3  | 99  | 4  | 136 | 1  | 173 | 3  |
| 26 | 3  | 63 | 4  | 100 | 3  | 137 | 1  | 174 | 2  |
| 27 | 2  | 64 | 4  | 101 | 4  | 138 | 1  | 175 | 4  |
| 28 | 2  | 65 | 1  | 102 | 4  | 139 | 1  | 176 | 1  |
| 29 | 3  | 66 | 2  | 103 | 3  | 140 | 4  | 177 | 3  |
| 30 | 1  | 67 | 1  | 104 | 2  | 141 | 1  | 178 | 2  |
| 31 | 4  | 68 | 4  | 105 | 3  | 142 | 2  | 179 | 1  |
| 32 | 3  | 69 | 3  | 106 | 4  | 143 | 1  | 180 | 3  |
| 33 | 2  | 70 | 3  | 107 | 3  | 144 | 3  | 181 | 1  |
| 34 | 3  | 71 | 2  | 108 | 2  | 145 | 2  | 182 | 4  |
| 35 | 2  | 72 | 1  | 109 | 2  | 146 | 1  |     |    |
| 36 | 4  | 73 | 2  | 110 | 3  | 147 | 4  |     |    |
| 37 | 3  | 74 | 4  | 111 | 2  | 148 | 4  |     |    |

QN= Question Number CA= Correct Answer
