# Supplementary material for: Evaluating ChatGPT Efficacy in Navigating the Spanish Medical Residency Entrance Examination (MIR): A New Horizon for AI in Clinical Medicine
Source: Preprints.org preprint supplement (doi:10.20944/preprints202309.1272.v1), 2023-09-19
Supplement: Supplementary file 4 [file supplementary]

Archive with 3 entries (3 files):
- Table S1  English Translation of the MIR Examination.pdf
- Table S2 Answer to MIR examination questions.pdf
- Table S3  Questions failed by GPT4 indicating the wrong answer and the classification of the Error.pdf
